# Supplementary material
Source: publisher figshare collection journal article supplement (https://karger.figshare.com/ndownloader/files/13368227)
Supplement: Supplementary file 1 [file 13368227]

**Online Suppl. Fig. S1.** The first basal cell carcinoma was observed in the proband’s right groin during the follow-up (A). Sequencing results (B) show the heterozygous germinal *PTCH1* mutation c.573C>G position (arrows) of the proband (II2; upper panel) and the wild-type sequence in her daughter (III1; lower panel).
